# Supplementary material for: Strigolactones Control Root System Architecture and Tip Anatomy in Solanum lycopersicum L. Plants under P Starvation
Source: MDPI journal article supplement (doi:10.3390/plants9050612), 2020-05-11
Supplement: s1 [file s1]

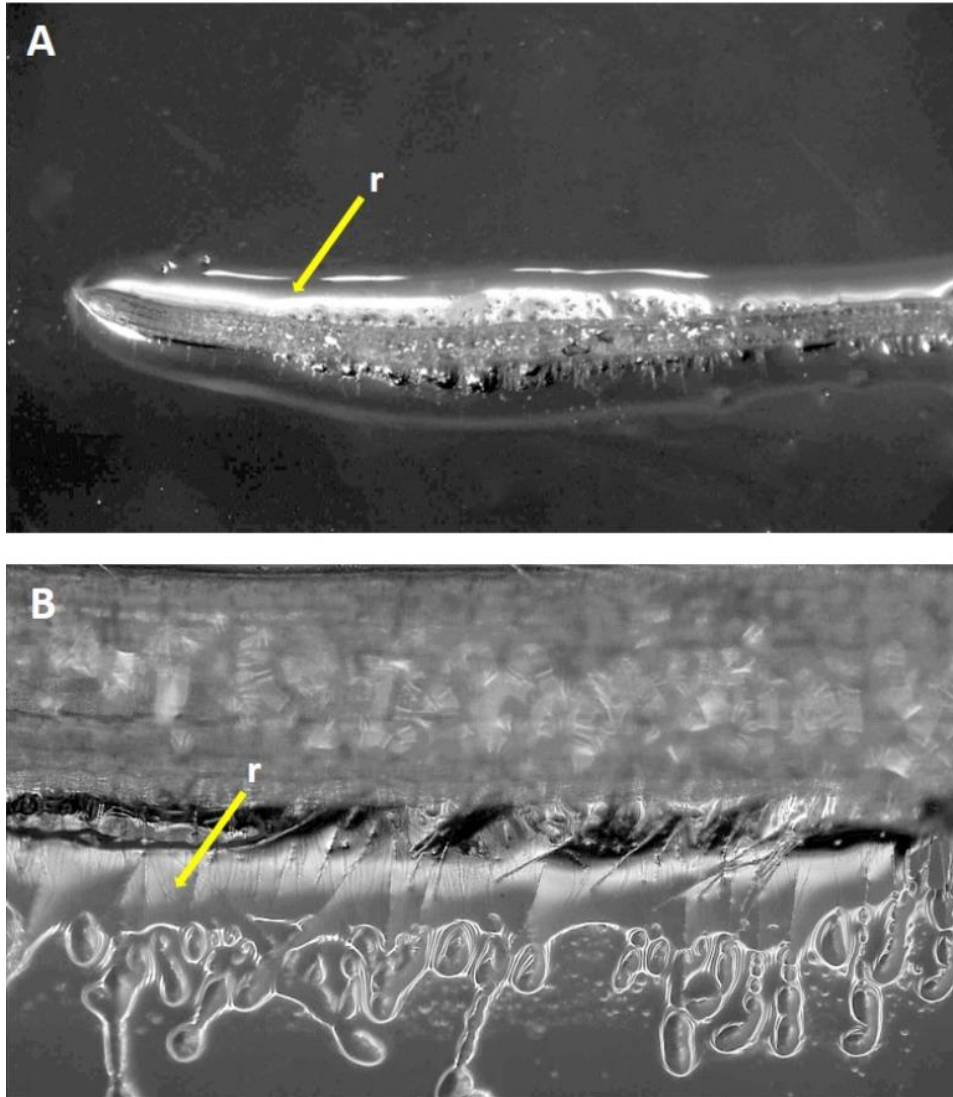

**Figure S1.** Root rhizodeposition (r) at the root tip (A) and at the differentiation zone (B) of P starved strigolactone-depleted plants. Note the short root hairs.
